# Supplementary material for: Chitosan hybrid nanoparticles as a theranostic platform for targeted doxorubicin/VEGF shRNA co-delivery and dual-modality fluorescence imaging
Source: Royal Society of Chemistry journal article supplement (doi:10.1039/c6ra03843c), 2016-01-01
Supplement: c6ra03843c1.pdf [file c6ra03843c1.pdf]

## Supporting Information

### Chitosan hybrid nanoparticles as a theranostic platform for targeted doxorubicin/VEGF shRNA co-delivery and dual-modality fluorescence imaging

Hong Yang<sup>1,2</sup> §, Min Xu<sup>1</sup> §, Shun Li<sup>1</sup>, Xue Shen<sup>1</sup>, Tingting Li<sup>1</sup>, Jie Yan<sup>1</sup>, Chengchen Zhang<sup>1</sup>,  
Chunhui Wu<sup>1,2</sup>, Hongjuan Zeng<sup>1,2</sup>, Yiyao Liu<sup>1,2\*</sup>

<sup>1</sup> Department of Biophysics, School of Life Science and Technology, <sup>2</sup> Center for Information in Medicine, University of Electronic Science and Technology of China, Chengdu 610054, Sichuan, P.R. China.

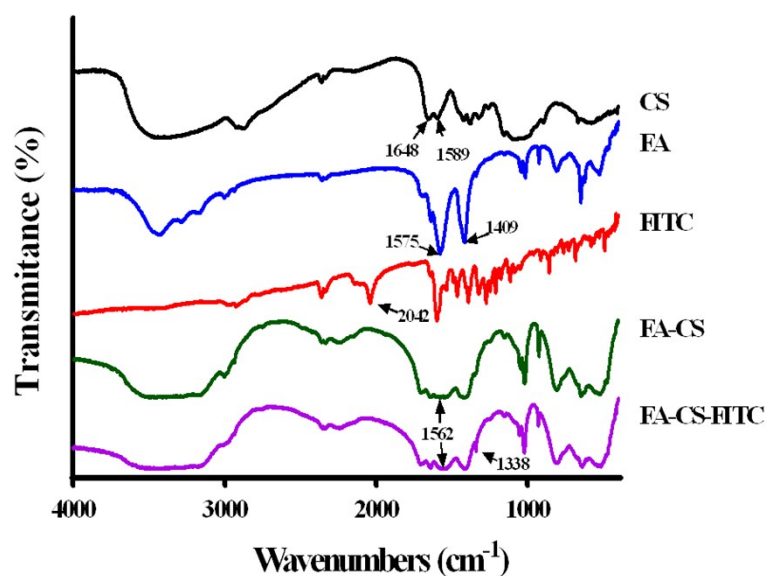

**Figure S1.** The FTIR spectroscopy of chitosan (CS), folic acid (FA), fluorescein isothiocyanate (FITC), FA-CS, and FA-CS-FITC.

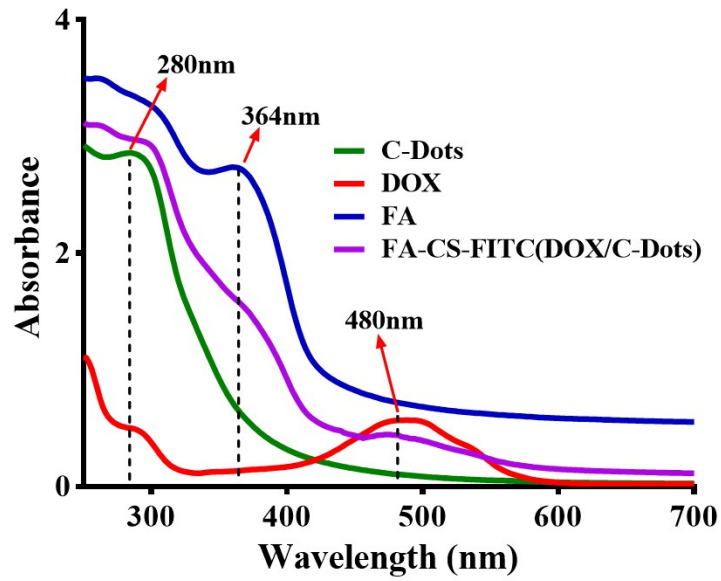

**Figure S2.** UV-Vis spectra of C-dots, DOX, and FA-CS-FITC(DOX/C-dots).

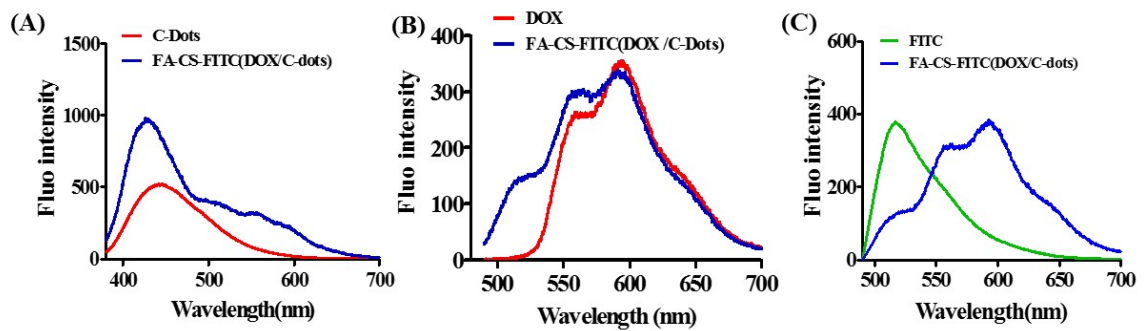

**Figure S3.** Fluorescence spectrum to detect the presence of C-dots (A), DOX (B) and FITC (C) in the FA-CS-FITC(DOX/C-dots) nanoparticles.

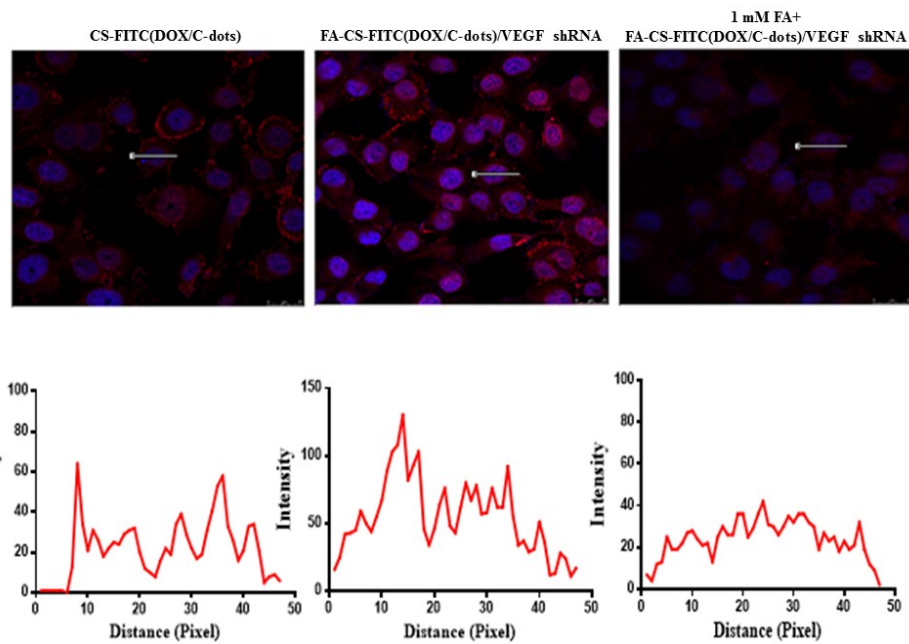

**Figure S4.** Fluorescence images (up panel) and line-scanning profiles (down panel) of fluorescence intensity for HeLa cells incubated for 6 h with indicated nanoparticles.

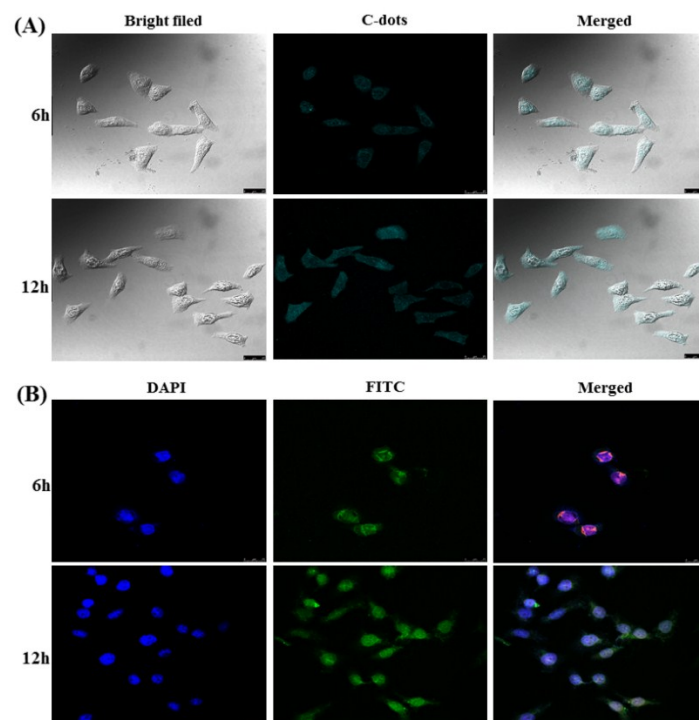

**Figure S5.** Cellular images of HeLa cells treated with FA-CS-FITC(DOX/C-dots) nanoparticles (20 µg/mL) for 6 h or 12 h by C-dots and FITC detection. Light blue (C-dots), Dark blue (DAPI, nuclei), and green (FITC).
